# Supplementary material for: Comprehensive analysis of NiFe2O4/MWCNTs nanocomposite to degrade a healthcare waste – tetracycline
Source: Royal Society of Chemistry journal article supplement (doi:10.1039/d3ra05398a), 2023-01-01
Supplement: d3ra05398a1.pdf [file d3ra05398a1.pdf]

## Supplementary information section

### Weight ratio variation of composites

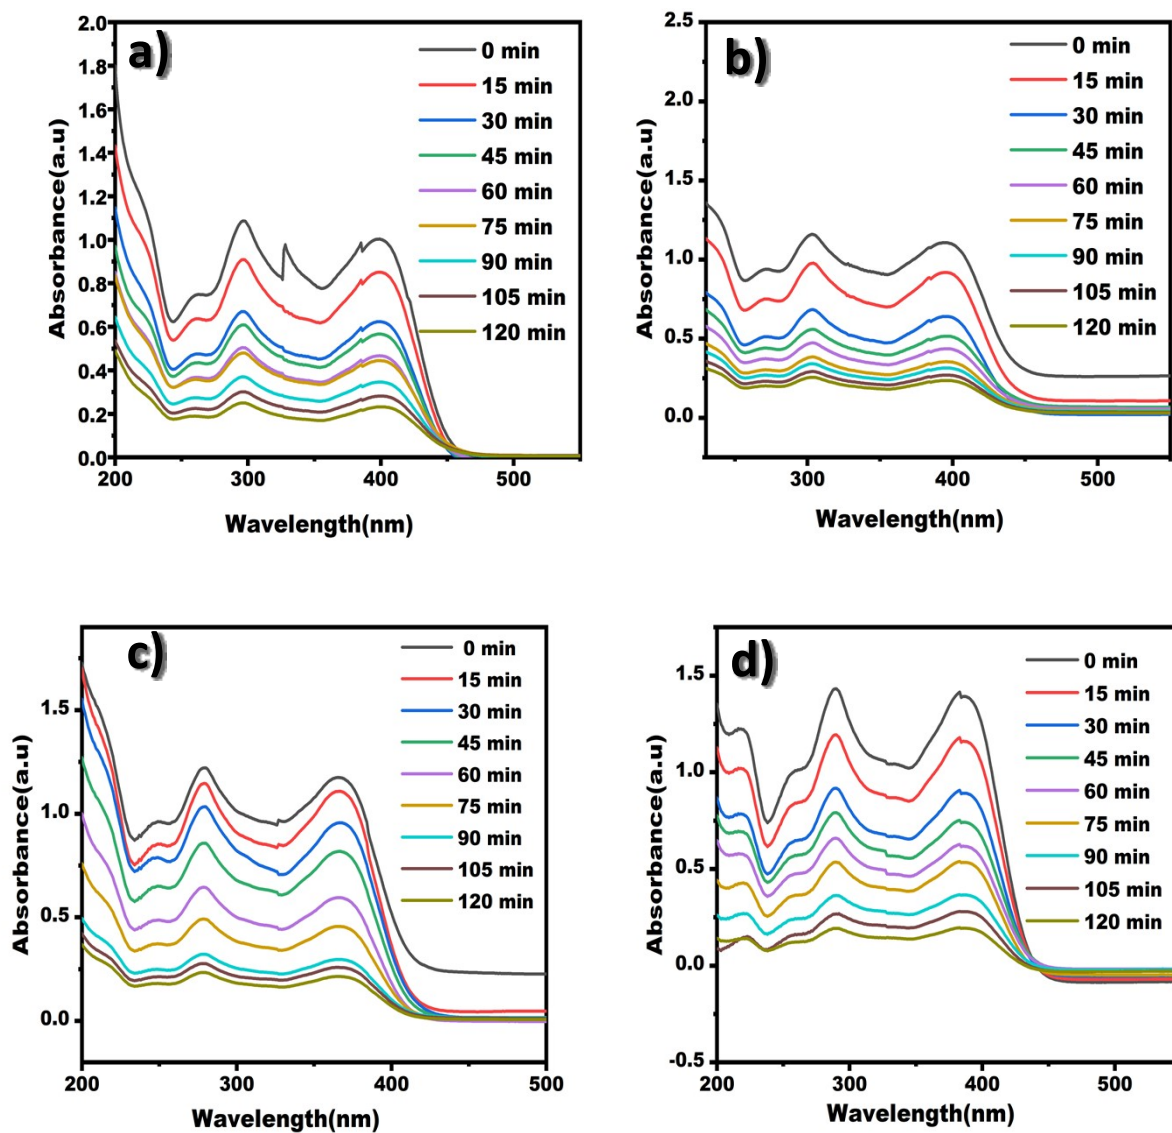

**Figs. S1.** a), b), c), and d) represent UV–Visible spectra of TC antibiotics degradation with different ratios of nanocomposites TN 0.5, TN 01, TN 02, and TN 03

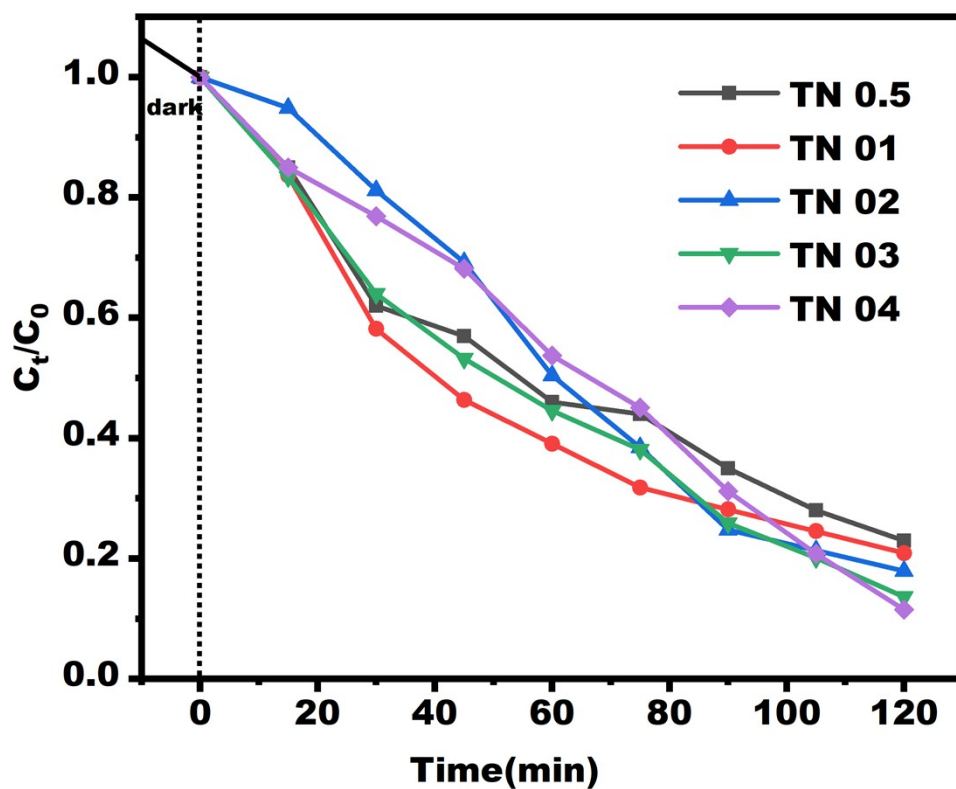

Fig. S2. Impact of reaction time and various catalyst ratios at pH 4 and 0.05 g/L of TC concentration in the presence of visible light

### TC – CONCENTRATION

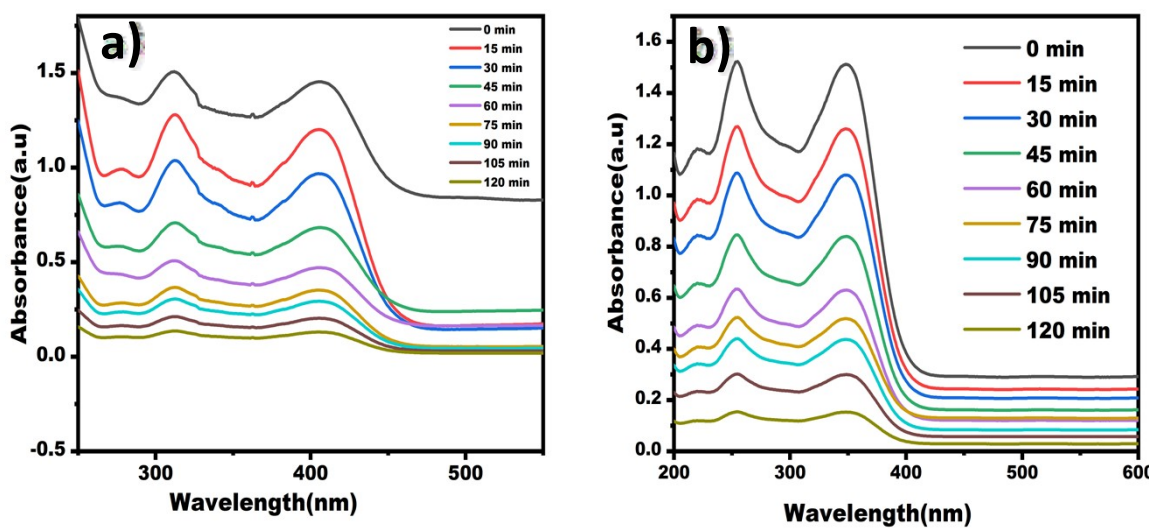

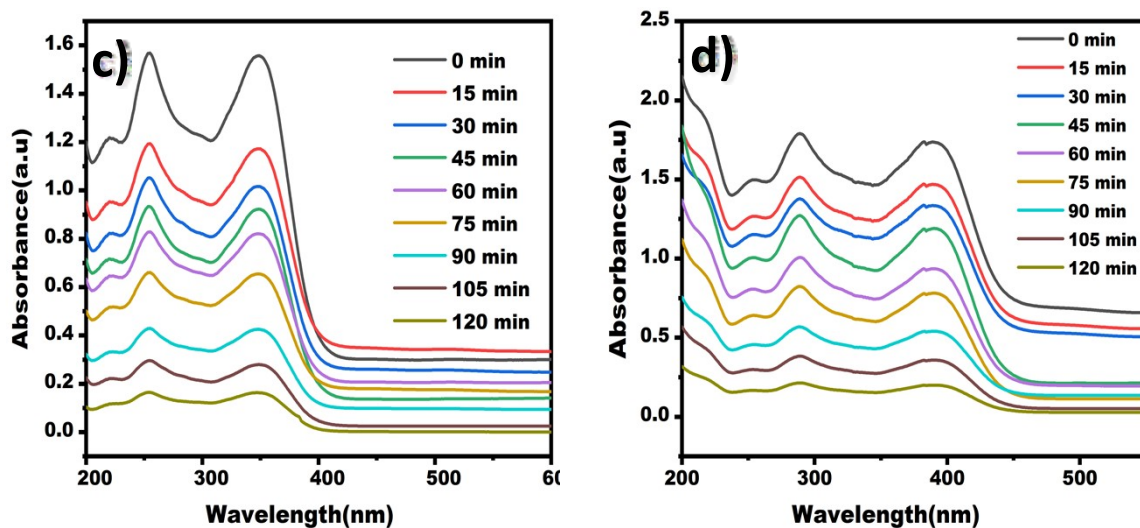

**Figs. S3.** a), b), c), and d) represent UV-visible spectra of TC antibiotics degradation with different concentrations of 0.02 g/L, 0.03 g/L, 0.04 g/L, and 0.05 g/L respectively

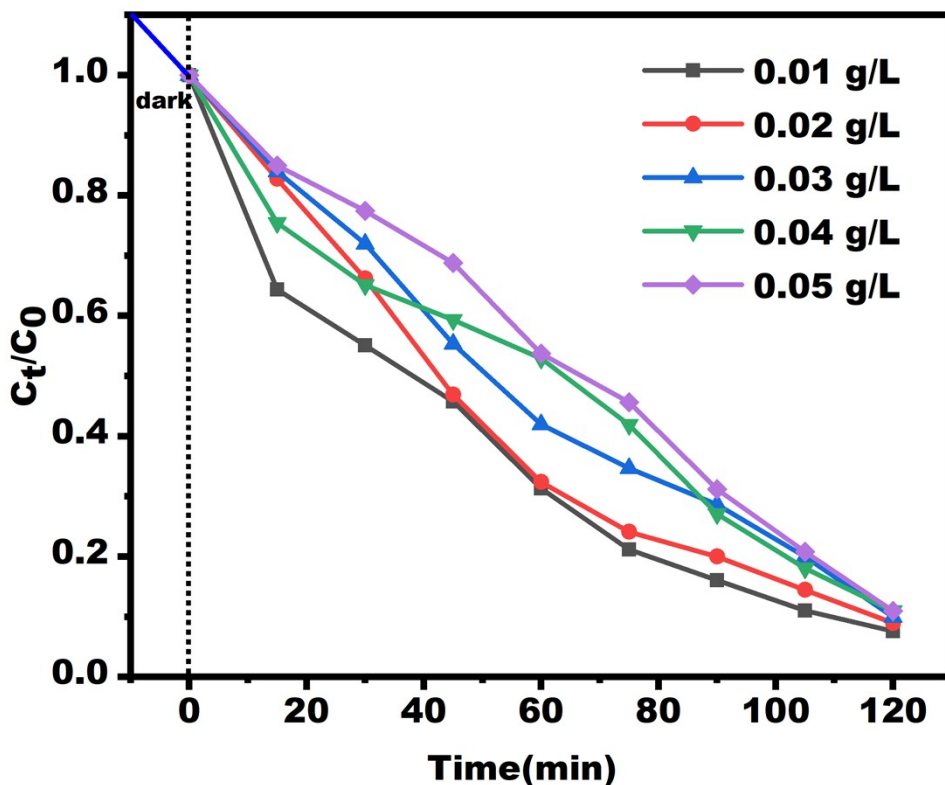

**Fig. S4.** Shows the impact on concentration ratios for TC degradation with different concentrations of TC solutions and nanocomposite 0.6 g/L of TN 04

## pH - VARIATIONS

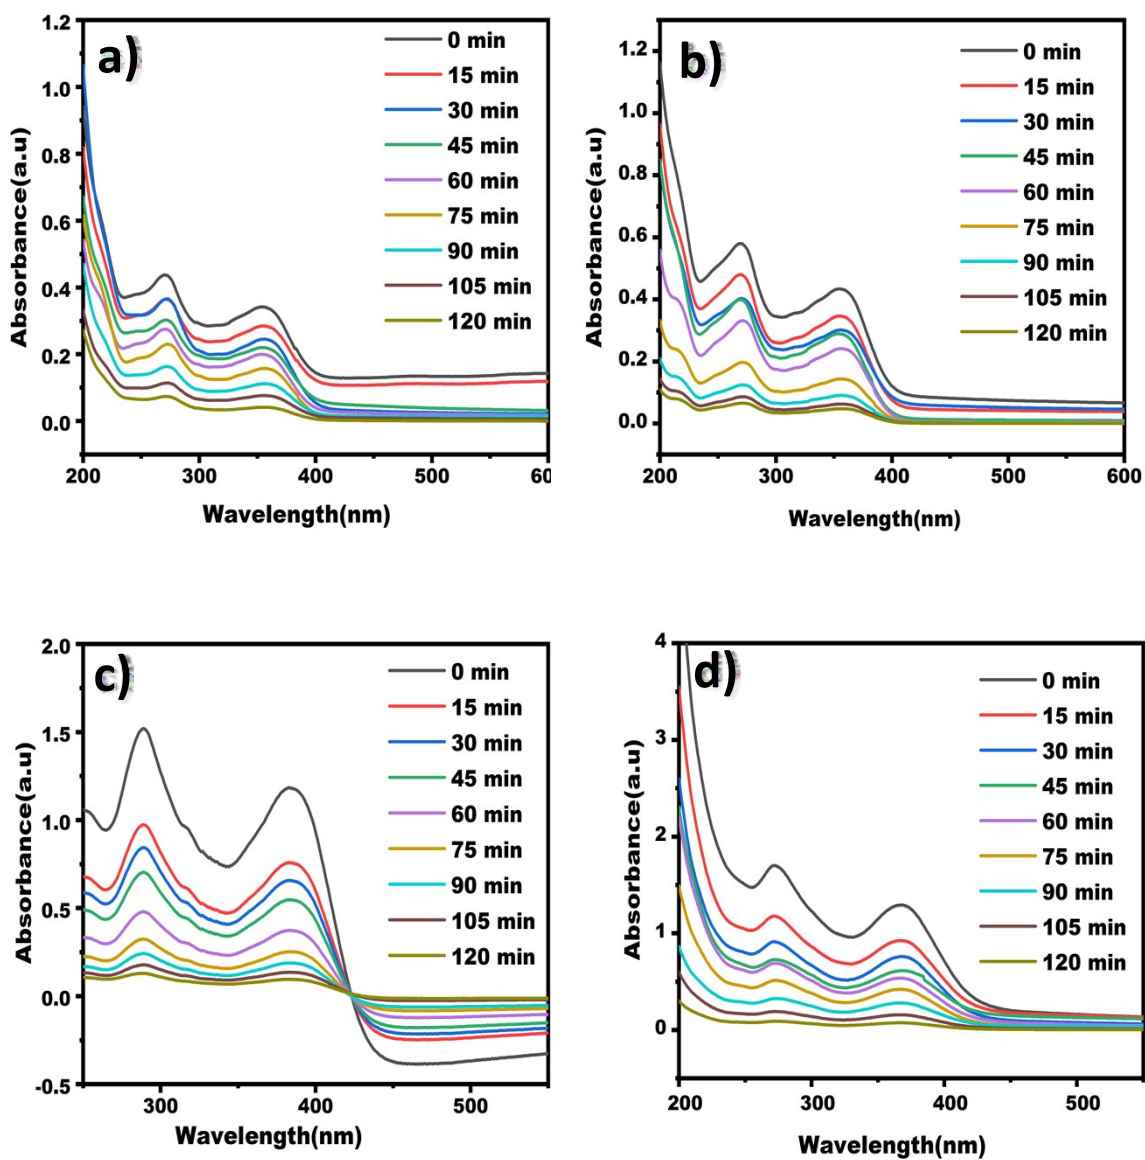

**Figs. S5.** a), b), c), and d) represent UV–visible spectra of TC antibiotics degradation with different pH values of 2, 3, 4, and 8 respectively

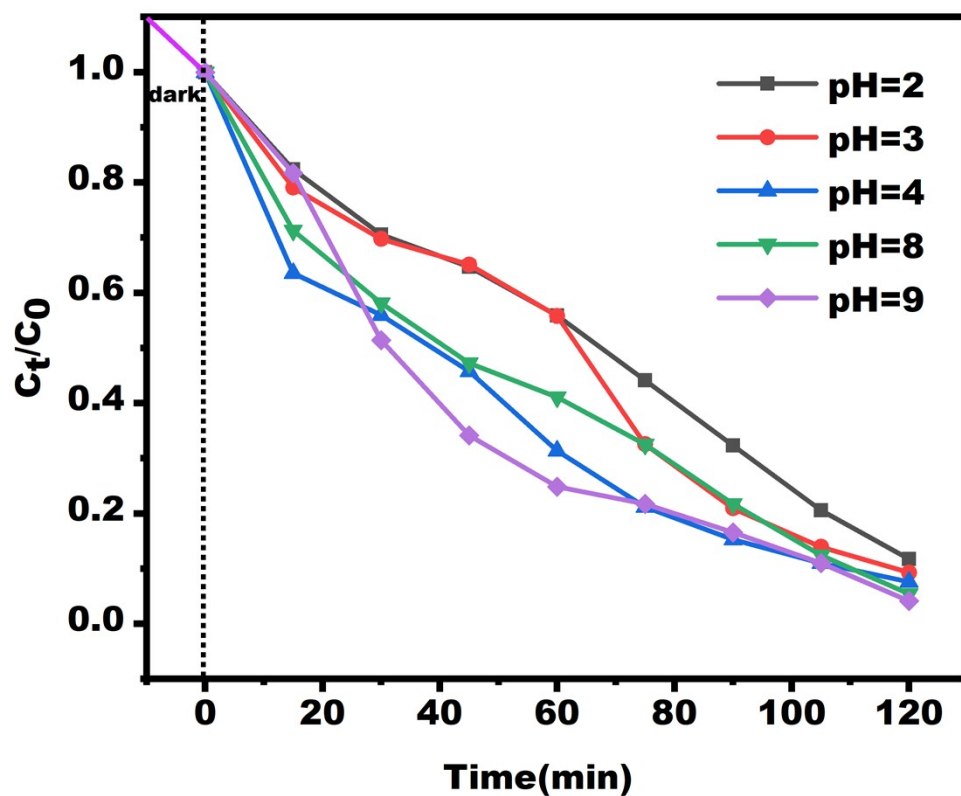

**Fig. S6.** Shows the impact on concentration ratios for TC degradation with different values of pH solutions, concentration of 0.01 g/L and nanocomposite 0.6 g/L of TN 04
